# Supplementary material for: Design and Synthesis of Aminopyrimidinyl Pyrazole Analogs as PLK1 Inhibitors Using Hybrid 3D-QSAR and Molecular Docking
Source: MDPI journal article supplement (doi:10.3390/ph15101170), 2022-09-21

# Design and Synthesis of Aminopyrimidinyl Pyrazole Analogs as PLK1 Inhibitors Using Hybrid 3D-QSAR and Molecular Docking

Swapnil P. Bhujbal <sup>1,2</sup>, Hyejin Kim <sup>1,2</sup>, Hyunah Bae <sup>1,2</sup> and Jung-Mi Hah <sup>1,2\*</sup>

<sup>1</sup> College of Pharmacy, Hanyang University, Ansan 426-791, Korea

<sup>2</sup> Institute of Pharmaceutical Science and Technology, Hanyang University, Ansan 426-791, Korea

\* Correspondence: jhah@hanyang.ac.kr; Tel.: +82-31-400-5803

## Supplementary Material

**Table S1:** The chemical structures of the selected PLK1 inhibitors with their IC<sub>50</sub> values.

| Dataset 1 : Pyrimidine derivatives |                |                 |                |                       |
|------------------------------------|----------------|-----------------|----------------|-----------------------|
|                                    |                |                 |                |                       |
| Compound                           | R <sup>1</sup> | R <sup>2</sup>  | R <sup>3</sup> | IC <sub>50</sub> (nM) |
| 1                                  |                | NO <sub>2</sub> |                | 4.67                  |
| 2*                                 |                |                 |                | 8.13                  |
| 3*                                 |                |                 |                | 6.19                  |
| 4                                  |                |                 |                | 1.58                  |
| 5                                  |                |                 |                | 4.37                  |
| 6*                                 |                |                 |                | 1.27                  |

|     |                                                                                     |                 |                                                                                      |       |
|-----|-------------------------------------------------------------------------------------|-----------------|--------------------------------------------------------------------------------------|-------|
| 7   |                                                                                     |                 | 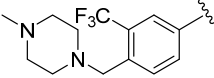   | 4175  |
| 8   |                                                                                     |                 |    | 5.13  |
| 9   |                                                                                     |                 |    | 5.26  |
| 10* |    |                 |    | 7.35  |
| 11  |                                                                                     |                 |    | 3.69  |
| 12  |                                                                                     |                 |   | 4.99  |
| 13  |                                                                                     |                 |  | 219   |
| 14  |  |                 |  | 3510  |
| 15  |                                                                                     |                 |  | 4395  |
| 16* |  |                 |  | 0.577 |
| 17  |                                                                                     |                 |  | 0.508 |
| 18* |  | CF <sub>3</sub> |  | 3.31  |

|     |  |                 |                                                                                      |       |
|-----|--|-----------------|--------------------------------------------------------------------------------------|-------|
| 19  |  |                 | 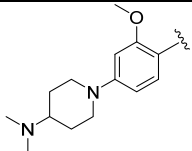   | 4.55  |
| 20  |  | CN              |    | 4.87  |
| 21* |  |                 |    | 3.82  |
| 22  |  |                 |    | 2.67  |
| 23  |  | F               |   | 29.3  |
| 24* |  |                 |  | 50.2  |
| 25* |  |                 |  | 188.5 |
| 26  |  | Br              |  | 4.28  |
| 27  |  |                 |  | 3.44  |
| 28  |  |                 |  | 1.39  |
| 29  |  | CH <sub>3</sub> |  | 4.72  |

|     |  |  |  |      |
|-----|--|--|--|------|
| 30* |  |  |  | 2.22 |
| 31  |  |  |  | 1.85 |

**Dataset 2 : Quinazoline derivatives**

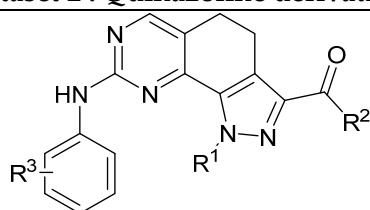

Compounds 32-65

| Compound | R <sup>1</sup>  | R <sup>2</sup>  | R <sup>3</sup>               | IC <sub>50</sub> (μM) |
|----------|-----------------|-----------------|------------------------------|-----------------------|
| 32       | CH <sub>3</sub> | NH <sub>2</sub> | -                            | 0.068                 |
| 33       |                 |                 | -                            | 0.006                 |
| 34*      |                 |                 | -                            | 10                    |
| 35       | H               |                 | -                            | 0.248                 |
| 36       |                 |                 | -                            | 0.143                 |
| 37       | <i>i</i> -Pr    |                 | -                            | 0.430                 |
| 38       | CH <sub>3</sub> | OH              | -                            | 0.110                 |
| 39       |                 | NHMe            | -                            | 4.215                 |
| 40       |                 | NH <sub>2</sub> | <i>o</i> -CF <sub>3</sub>    | 0.432                 |
| 41*      |                 |                 | <i>m</i> -CF <sub>3</sub>    | 0.051                 |
| 42       |                 |                 | <i>p</i> -CF <sub>3</sub>    | 0.872                 |
| 43       |                 |                 | <i>o</i> -Ac                 | 0.346                 |
| 44       |                 |                 | <i>m</i> -Ac                 | 0.100                 |
| 45       |                 |                 | <i>p</i> -Ac                 | 0.197                 |
| 46       |                 |                 | <i>o</i> -OMe                | 0.042                 |
| 47       |                 |                 | <i>m</i> -OMe                | 0.135                 |
| 48       |                 |                 | <i>p</i> -OMe                | 0.256                 |
| 49       |                 |                 | <i>o</i> -NO <sub>2</sub>    | 0.488                 |
| 50       |                 |                 | <i>o</i> -Me                 | 0.015                 |
| 51       |                 |                 | <i>o</i> -SMe                | 0.097                 |
| 52       |                 |                 | <i>o</i> -NHMe               | 0.110                 |
| 53       |                 |                 | <i>o</i> -F                  | 0.125                 |
| 54       |                 |                 | <i>o</i> - <i>i</i> -Pr      | 0.365                 |
| 55       |                 |                 | <i>o</i> -CO <sub>2</sub> Me | 1.117                 |
| 56*      |                 |                 | <i>o</i> -CONH <sub>2</sub>  | 2.076                 |

| 57*                                                                               |                |                              | <i>o</i> -SO <sub>2</sub> NH <sub>2</sub> | 3.733                 |
|-----------------------------------------------------------------------------------|----------------|------------------------------|-------------------------------------------|-----------------------|
| 58*                                                                               |                |                              | <i>o</i> -Ph                              | 1.565                 |
| 59                                                                                |                |                              | <i>o</i> -OPh                             | 0.278                 |
| 60                                                                                |                |                              | <i>o</i> -benzyl                          | 0.943                 |
| 61                                                                                |                |                              | <i>o</i> -NHPh                            | 0.949                 |
| 62                                                                                |                |                              | <i>o</i> -benzoyl                         | 1.969                 |
| 63*                                                                               |                |                              | <i>o</i> -SPh                             | 2.033                 |
| 64                                                                                |                |                              | <i>o</i> -NH <sub>2</sub>                 | 0.150                 |
| 65                                                                                |                |                              | <i>o</i> -NHAc                            | 2.523                 |
| 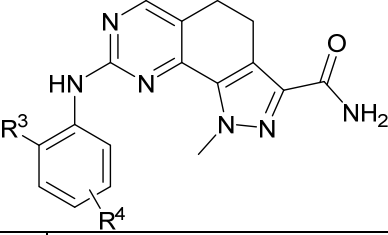 |                |                              |                                           |                       |
| Compound                                                                          | R <sup>3</sup> | R <sup>4</sup>               |                                           | IC <sub>50</sub> (μM) |
| 66                                                                                | Ac             | 3'-(4-methyl-piperazin-1-yl) |                                           | 2.051                 |
| 67*                                                                               |                | 4'-(4-methyl-piperazin-1-yl) |                                           | 0.464                 |
| 68*                                                                               |                | 5'-methyl-piperazin-1-yl     |                                           | 0.109                 |
| 69                                                                                | OMe            | 4'-(4-methyl-piperazin-1-yl) |                                           | 0.040                 |
| 70                                                                                |                | 5'-(4-methyl-piperazin-1-yl) |                                           | 0.007                 |

\* denotes test set compounds in Table S1.

**Table S2:** CoMSIA models developed using different combinations of fields.

| CoMSIA | $q^2$ | ONC | SEP   | $r^2$ | SEE   | F value |
|--------|-------|-----|-------|-------|-------|---------|
| S      | 0.543 | 6   | 0.821 | 0.820 | 0.515 | 47.777  |
| E      | 0.414 | 6   | 0.929 | 0.755 | 0.601 | 32.290  |
| H      | 0.521 | 3   | 0.821 | 0.772 | 0.566 | 74.597  |
| A      | 0.357 | 2   | 0.944 | 0.487 | 0.849 | 20.910  |
| D      | 0.367 | 1   | 0.930 | 0.408 | 0.899 | 46.901  |
| SE     | 0.495 | 6   | 0.863 | 0.817 | 0.519 | 46.902  |
| EH     | 0.544 | 6   | 0.820 | 0.850 | 0.470 | 59.560  |
| EA     | 0.405 | 6   | 0.937 | 0.767 | 0.587 | 34.493  |
| ED     | 0.407 | 6   | 0.935 | 0.782 | 0.567 | 37.698  |
| SH     | 0.492 | 4   | 0.852 | 0.793 | 0.543 | 62.427  |

|            |              |          |              |              |              |               |
|------------|--------------|----------|--------------|--------------|--------------|---------------|
| SA         | 0.459        | 6        | 0.893        | 0.794        | 0.551        | 40..529       |
| SD         | 0.452        | 6        | 0.898        | 0.860        | 0.454        | 64.557        |
| HA         | 0.480        | 5        | 0.869        | 0.848        | 0.474        | 58.495        |
| HD         | 0.492        | 3        | 0.845        | 0.787        | 0.547        | 81.452        |
| <b>SEH</b> | <b>0.540</b> | <b>6</b> | <b>0.824</b> | <b>0.855</b> | <b>0.462</b> | <b>61.993</b> |
| SEA        | 0.470        | 6        | 0.884        | 0.827        | 0.505        | 50.133        |
| SED        | 0.468        | 6        | 0.885        | 0.850        | 0.471        | 59.414        |
| EHA        | 0.534        | 6        | 0.828        | 0.866        | 0.444        | 68.068        |
| EHD        | 0.518        | 6        | 0.843        | 0.879        | 0.423        | 75.941        |
| SHA        | 0.474        | 5        | 0.874        | 0.826        | 0.503        | 60.653        |
| SHD        | 0.465        | 4        | 0.884        | 0.812        | 0.518        | 70.353        |
| EAD        | 0.364        | 6        | 0.968        | 0.772        | 0.580        | 35.526        |
| HAD        | 0.456        | 5        | 0.889        | 0.835        | 0.490        | 64.586        |
| SEHD       | 0.515        | 6        | 0.846        | 0.880        | 0.421        | 76.829        |
| SEHA       | 0.533        | 6        | 0.830        | 0.871        | 0.436        | 71.024        |
| SEAD       | 0.438        | 6        | 0.910        | 0.835        | 0.493        | 53.227        |
| EHAD       | 0.516        | 6        | 0.845        | 0.884        | 0.413        | 80.223        |
| SHAD       | 0.447        | 5        | 0.895        | 0.844        | 0.475        | 69.484        |
| SEHAD      | 0.518        | 6        | 0.843        | 0.889        | 0.404        | 84.316        |

**Table S3:** The predicted pIC<sub>50</sub> and residual values for both CoMFA and CoMSIA (SEH) models.

| Compound | Actual pIC <sub>50</sub> | CoMFA                       |          | CoMSIA (SEH)                |          |
|----------|--------------------------|-----------------------------|----------|-----------------------------|----------|
|          |                          | Predicted pIC <sub>50</sub> | Residual | Predicted pIC <sub>50</sub> | Residual |
| 01       | 8.331                    | 8.548                       | -0.217   | 8.546                       | -0.215   |
| 02       | 8.090                    | 8.515                       | -0.425   | 8.723                       | -0.633   |
| 03       | 8.208                    | 7.779                       | 0.429    | 7.702                       | 0.506    |
| 04       | 8.801                    | 8.526                       | 0.275    | 8.853                       | -0.052   |
| 05       | 8.360                    | 8.039                       | 0.321    | 8.002                       | 0.358    |
| 06       | 8.896                    | 8.659                       | 0.237    | 8.608                       | 0.288    |
| 07       | 5.379                    | 5.340                       | 0.039    | 5.183                       | 0.196    |
| 08       | 8.290                    | 8.477                       | -0.187   | 8.397                       | -0.107   |
| 09       | 8.279                    | 7.964                       | 0.315    | 7.828                       | 0.451    |

|    |       |       |        |       |        |
|----|-------|-------|--------|-------|--------|
| 10 | 8.134 | 7.978 | 0.156  | 7.930 | 0.204  |
| 11 | 8.433 | 8.797 | -0.364 | 8.714 | -0.281 |
| 12 | 8.302 | 8.299 | 0.003  | 8.421 | -0.119 |
| 13 | 6.660 | 6.554 | 0.106  | 6.599 | 0.061  |
| 14 | 5.455 | 5.386 | 0.069  | 5.404 | 0.051  |
| 15 | 5.357 | 5.526 | -0.169 | 5.550 | -0.193 |
| 16 | 9.239 | 9.048 | 0.191  | 8.906 | 0.333  |
| 17 | 9.294 | 8.904 | 0.390  | 9.027 | 0.267  |
| 18 | 8.480 | 8.799 | -0.319 | 8.469 | 0.011  |
| 19 | 8.342 | 8.812 | -0.470 | 8.721 | -0.379 |
| 20 | 8.312 | 8.197 | 0.115  | 7.991 | 0.321  |
| 21 | 8.418 | 8.614 | -0.196 | 8.149 | 0.269  |
| 22 | 8.573 | 8.628 | -0.055 | 8.401 | 0.172  |
| 23 | 7.533 | 8.114 | -0.581 | 8.055 | -0.522 |
| 24 | 7.299 | 7.538 | -0.239 | 8.214 | -0.915 |
| 25 | 6.725 | 6.552 | 0.173  | 6.466 | 0.259  |
| 26 | 8.369 | 8.217 | 0.152  | 8.410 | -0.041 |
| 27 | 8.463 | 8.647 | -0.184 | 8.569 | -0.106 |
| 28 | 8.857 | 8.660 | 0.197  | 8.820 | 0.037  |
| 29 | 8.326 | 8.255 | 0.071  | 8.153 | 0.173  |
| 30 | 8.654 | 8.695 | -0.041 | 8.312 | 0.342  |
| 31 | 8.733 | 8.706 | 0.027  | 8.564 | 0.169  |
| 32 | 7.167 | 6.543 | 0.624  | 6.557 | 0.610  |
| 33 | 8.222 | 7.487 | 0.735  | 7.888 | 0.334  |
| 34 | 5.000 | 5.739 | -0.739 | 5.825 | -0.825 |
| 35 | 6.606 | 6.566 | 0.040  | 6.549 | 0.057  |
| 36 | 6.845 | 6.936 | -0.091 | 6.742 | 0.103  |
| 37 | 6.367 | 6.571 | -0.204 | 6.459 | -0.092 |
| 38 | 6.959 | 6.677 | 0.282  | 6.772 | 0.187  |
| 39 | 5.375 | 6.281 | -0.906 | 6.626 | -1.251 |
| 40 | 6.365 | 6.583 | -0.218 | 6.522 | -0.157 |
| 41 | 7.292 | 6.032 | 1.260  | 7.161 | 0.131  |
| 42 | 6.059 | 6.405 | -0.346 | 6.280 | -0.221 |
| 43 | 6.461 | 6.600 | -0.139 | 6.379 | 0.082  |
| 44 | 7.000 | 6.916 | 0.084  | 6.642 | 0.358  |
| 45 | 6.706 | 7.005 | -0.299 | 6.706 | 0.000  |
| 46 | 7.377 | 7.007 | 0.370  | 6.814 | 0.563  |
| 47 | 6.870 | 6.485 | 0.385  | 6.685 | 0.185  |
| 48 | 6.592 | 6.643 | -0.051 | 6.777 | -0.185 |
| 49 | 6.312 | 6.558 | -0.246 | 6.728 | -0.416 |
| 50 | 7.824 | 6.895 | 0.929  | 6.811 | 1.013  |
| 51 | 7.013 | 6.840 | 0.173  | 6.792 | 0.221  |
| 52 | 6.959 | 6.842 | 0.117  | 6.705 | 0.254  |
| 53 | 6.903 | 6.506 | 0.397  | 6.558 | 0.345  |
| 54 | 6.438 | 6.853 | -0.415 | 6.861 | -0.423 |





|                                                                                    |    |                                                                                    |                                                                                     |                 |                   |   |    |        |
|------------------------------------------------------------------------------------|----|------------------------------------------------------------------------------------|-------------------------------------------------------------------------------------|-----------------|-------------------|---|----|--------|
| 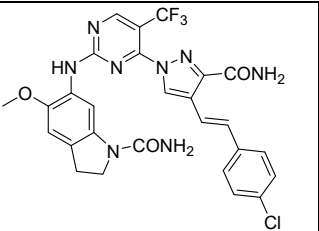   | D3 |  |    | CF <sub>3</sub> | CONH <sub>2</sub> | H | Cl | 10.217 |
|    | D4 |                                                                                    |    |                 |                   |   |    | 9.309  |
|   | D5 |                                                                                    |    |                 |                   |   |    | 9.715  |
|  | D6 |                                                                                    |  |                 |                   |   |    | 9.223  |
|  | D7 |                                                                                    |  |                 |                   |   |    | 9.394  |
|  | D8 |                                                                                    | SO <sub>2</sub> NH <sub>2</sub>                                                     |                 |                   |   |    | 9.418  |

|                                                                                    |     |  |                                                                                     |  |  |  |        |
|------------------------------------------------------------------------------------|-----|--|-------------------------------------------------------------------------------------|--|--|--|--------|
| 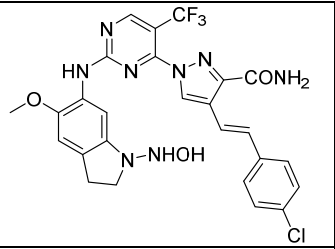   | D9  |  | NHOH                                                                                |  |  |  | 9.509  |
|    | D10 |  |    |  |  |  | 10.272 |
|   | D11 |  |    |  |  |  | 9.829  |
|  | D12 |  |  |  |  |  | 9.914  |
|  | D13 |  |  |  |  |  | 9.422  |
|  | D14 |  |  |  |  |  | 9.811  |

|                                                                                    |     |  |                                                                                     |  |  |  |  |        |
|------------------------------------------------------------------------------------|-----|--|-------------------------------------------------------------------------------------|--|--|--|--|--------|
| 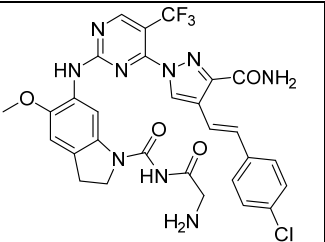   | D15 |  |    |  |  |  |  | 9.709  |
|    | D16 |  |    |  |  |  |  | 9.66   |
|   | D17 |  |    |  |  |  |  | 9.903  |
|  | D18 |  |  |  |  |  |  | 9.269  |
|  | D19 |  |  |  |  |  |  | 9.317  |
|  | D20 |  |  |  |  |  |  | 10.056 |

|                                                                                    |     |                                                                                     |                                                                                     |                   |                   |   |    |        |
|------------------------------------------------------------------------------------|-----|-------------------------------------------------------------------------------------|-------------------------------------------------------------------------------------|-------------------|-------------------|---|----|--------|
| 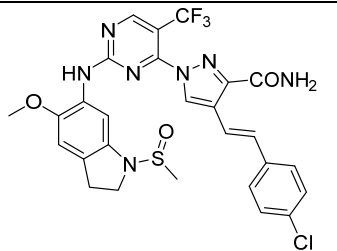   | D21 |                                                                                     |    |                   |                   |   |    | 9.428  |
| R <sup>1</sup> + R <sup>2</sup>                                                    |     |                                                                                     |                                                                                     |                   |                   |   |    |        |
|    | D22 |                                                                                     |    | CF <sub>3</sub>   | CONH <sub>2</sub> | H | Cl | 9.221  |
|   | D23 |                                                                                     |   |                   |                   |   |    | 10.188 |
|  | D24 |                                                                                     |  |                   |                   |   |    | 9.544  |
|  | D25 |                                                                                     |  |                   |                   |   |    | 9.411  |
| R <sup>3</sup> Only                                                                |     |                                                                                     |                                                                                     |                   |                   |   |    |        |
|  | D26 |  |  | NHCF <sub>3</sub> | CONH <sub>2</sub> | H | Cl | 9.029  |

| R <sup>4</sup> Only                                                                |     |                                                                                     |                                                                                     |                 |                                                                                       |   |    |       |
|------------------------------------------------------------------------------------|-----|-------------------------------------------------------------------------------------|-------------------------------------------------------------------------------------|-----------------|---------------------------------------------------------------------------------------|---|----|-------|
| 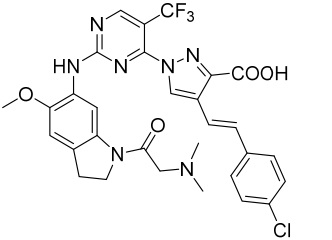   | D27 |  |  | CF <sub>3</sub> | COOH                                                                                  | H | Cl | 9.052 |
|    | D28 |                                                                                     |                                                                                     |                 | OCF <sub>3</sub>                                                                      |   |    | 9.133 |
|   | D29 |                                                                                     |                                                                                     |                 |    |   |    | 9.067 |
|  | D30 |                                                                                     |                                                                                     |                 |  |   |    | 9.114 |
|  | D31 |                                                                                     |                                                                                     |                 | NHOH                                                                                  |   |    | 9.123 |
|  | D32 |                                                                                     |                                                                                     |                 |  |   |    | 9.081 |

|                                                                                    |     |  |  |  |  |                                                                                       |  |  |       |
|------------------------------------------------------------------------------------|-----|--|--|--|--|---------------------------------------------------------------------------------------|--|--|-------|
| 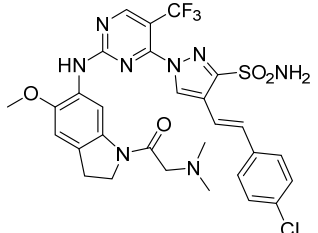   | D33 |  |  |  |  | $\text{SO}_2\text{NH}_2$                                                              |  |  | 9.059 |
|    | D34 |  |  |  |  |    |  |  | 9.059 |
|   | D35 |  |  |  |  |    |  |  | 9.163 |
|  | D36 |  |  |  |  |  |  |  | 9.151 |
|  | D37 |  |  |  |  |  |  |  | 9.118 |
|  | D38 |  |  |  |  |  |  |  | 9.047 |

|                                                                                   |     |   |                                                                                   |   |                                                                                     |   |   |      |
|-----------------------------------------------------------------------------------|-----|---|-----------------------------------------------------------------------------------|---|-------------------------------------------------------------------------------------|---|---|------|
| 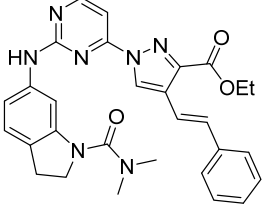 | D39 | H |  | H |  | H | H | 9.45 |
|  | D40 | H |  | H | CONH <sub>2</sub>                                                                   | H | H | 9.89 |

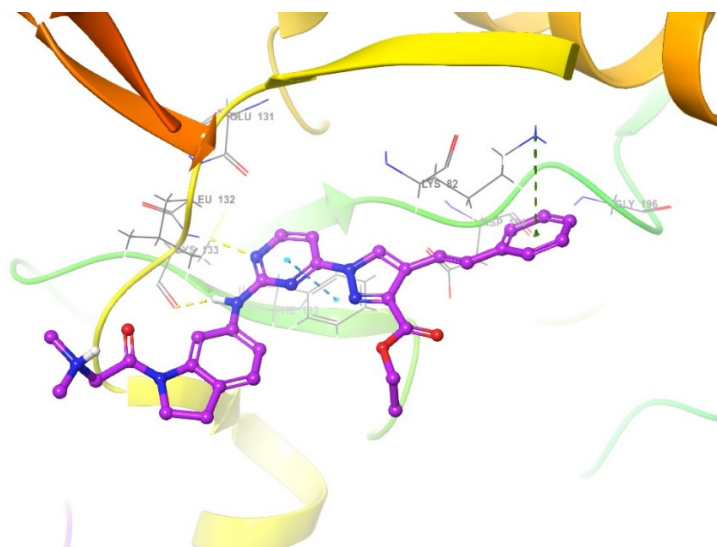

Figure S1. Induced Fit docked pose of the designed compound 39, within the active site of PLK1 (Hydrogen bonds are represented as yellow dotted lines, pi-pi interactions are represented as cyan dotted lines; docking score = -11.284).

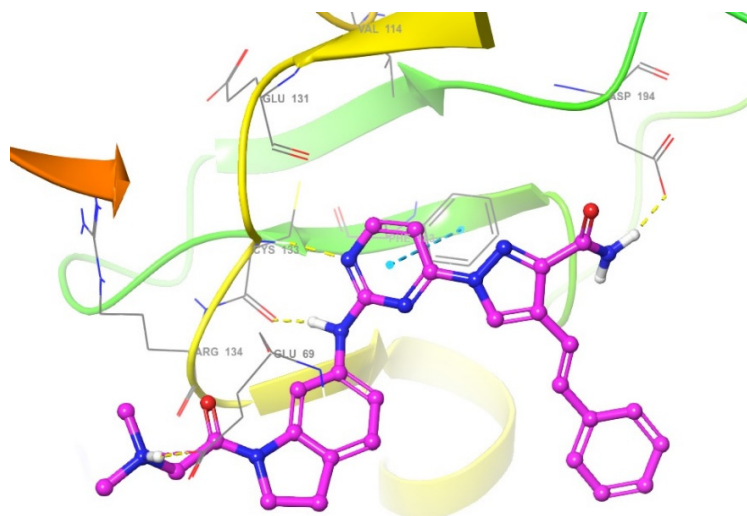

Figure S2. Induced Fit Docked pose of the designed compound 40, within the active site of PLK1 (Hydrogen bonds are represented as yellow dotted lines, pi-pi interactions are represented as cyan dotted lines; docking score = -11.753).

## **<sup>1</sup>H NMR Spectra**

### **D39**

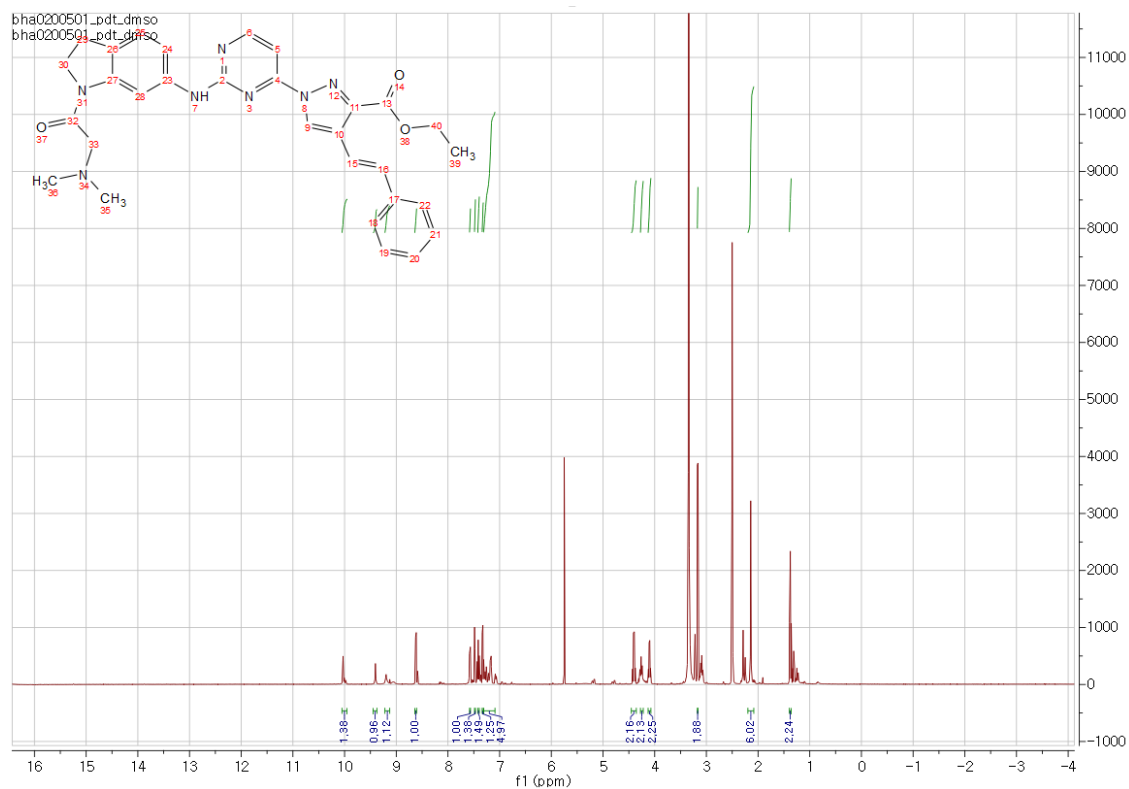



bha0200601\_pdt\_2\_dms0  
bha0200601\_pdt\_2\_dms0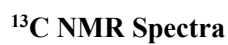

bha0200501\_pdt\_c\_nmr  
bha0200501\_pdt\_c\_nmr

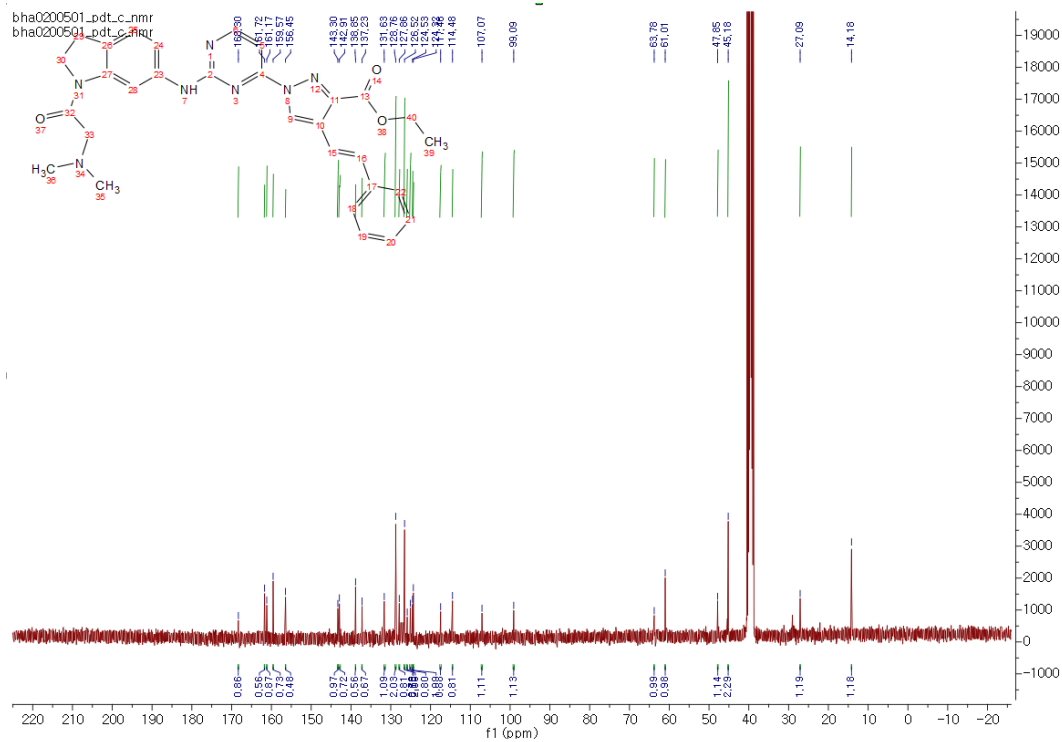

# D40

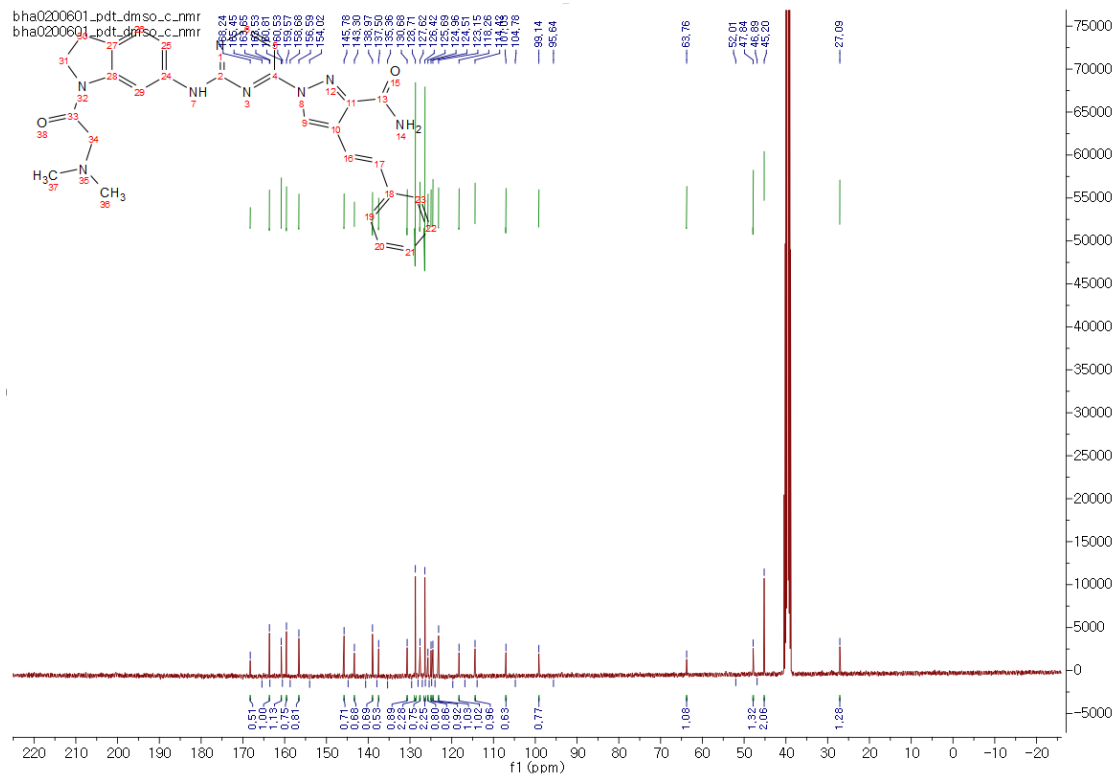

Supplement: s1 [file s1]
